# Supplementary material for: Mesenteric IL-10-producing CD5+ regulatory B cells suppress cow’s milk casein-induced allergic responses in mice
Source: PubMed Central journal article supplement (PMC4726293; doi:10.1038/srep19685), 2016-01-20
Supplement: srep19685-s1.pdf [file srep19685-s1.pdf]

## Supplementary information

### Mesenteric IL-10-producing CD5<sup>+</sup> regulatory B cells suppress cow's milk casein-induced allergic responses in mice

A-Ram Kim<sup>1†</sup>, Hyuk Soon Kim<sup>1†</sup>, Do Kyun Kim<sup>1</sup>, Seung Taek Nam<sup>1</sup>, Hyun Woo Kim<sup>1</sup>, Young Hwan Park<sup>1</sup>, Dajeong Lee<sup>1</sup>, Min Bum Lee<sup>1</sup>, Jun Ho Lee<sup>1</sup>, Bokyung Kim<sup>1</sup>, Michael A. Beaven<sup>2</sup>, Hyung Sik Kim<sup>3</sup>, Young Mi Kim<sup>4</sup> & Wahn Soo Choi<sup>1\*</sup>

<sup>1</sup>School of Medicine, Konkuk University, Chungju 380-701, Korea; <sup>2</sup>Laboratory of Molecular Immunology, National Heart, Lung, and Blood Institute, National Institutes of Health, Bethesda, MD20892; <sup>3</sup>School of Pharmacy, Sungkyunkwan University, Suwon 440-746, Korea; <sup>4</sup>College of Pharmacy, Duksung Women's University, Seoul 132-714, Korea.

Correspondence and requests for materials should be addressed to W.S.C. (email: wahnchoi@kku.ac.kr)

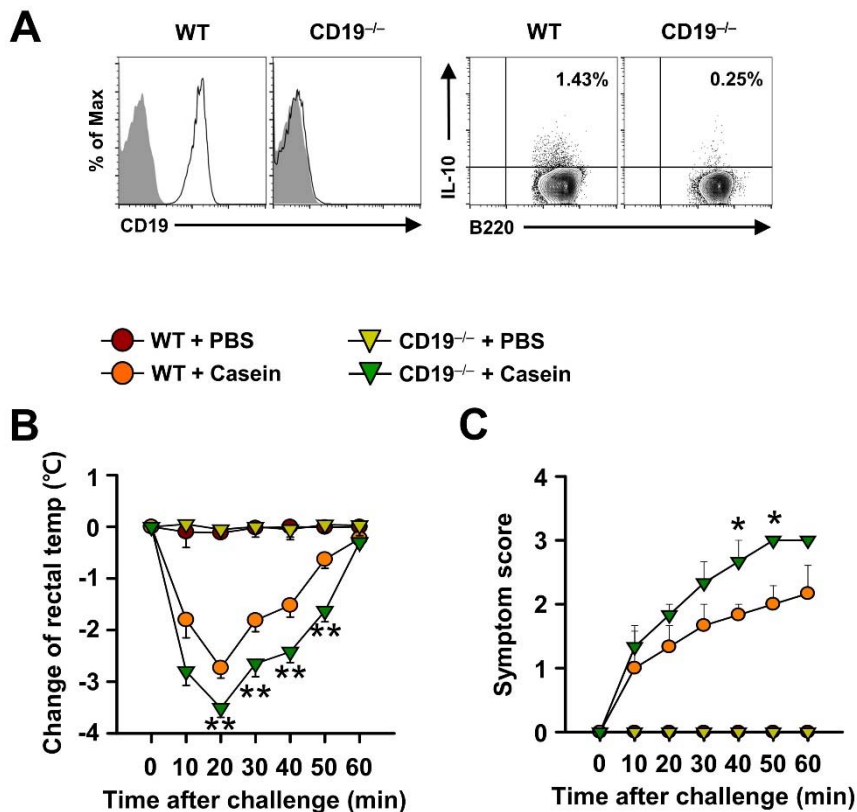

**Figure S1. CD19 deficiency aggravates allergic symptoms in casein-induced allergy mice.** (A) The percentage of IL-10<sup>+</sup> cells among B220<sup>+</sup> and CD5<sup>+</sup>B220<sup>+</sup> MLN cells by flow cytometry. (B) The severity of casein-induced allergy (CIA) was estimated by changes of body temperatures and systemic symptom scores in CD19<sup>-/-</sup> mice. Data are mean ± SEM (n = 8). The statistical differences were presented between WT+Casein and CD19<sup>-/-</sup>+ Casein groups (D). \*\*, p < 0.01; \*, p < 0.05; n.s., not significant.
